# Supplementary material for: Perception of a divergent family of phytocytokines by the Arabidopsis receptor kinase MIK2
Source: PubMed Central journal article supplement (PMC7846792; doi:10.1038/s41467-021-20932-y), 2021-01-29
Supplement: 41467_2021_20932_MOESM1_ESM.pdf [file 41467_2021_20932_MOESM1_ESM.pdf]

# Perception of a divergent family of phyto cytokines by the Arabidopsis receptor kinase MIK2

Rhodes *et al.*

Supplementary Figures 1 – 11;  
Supplementary Tables 1 - 4

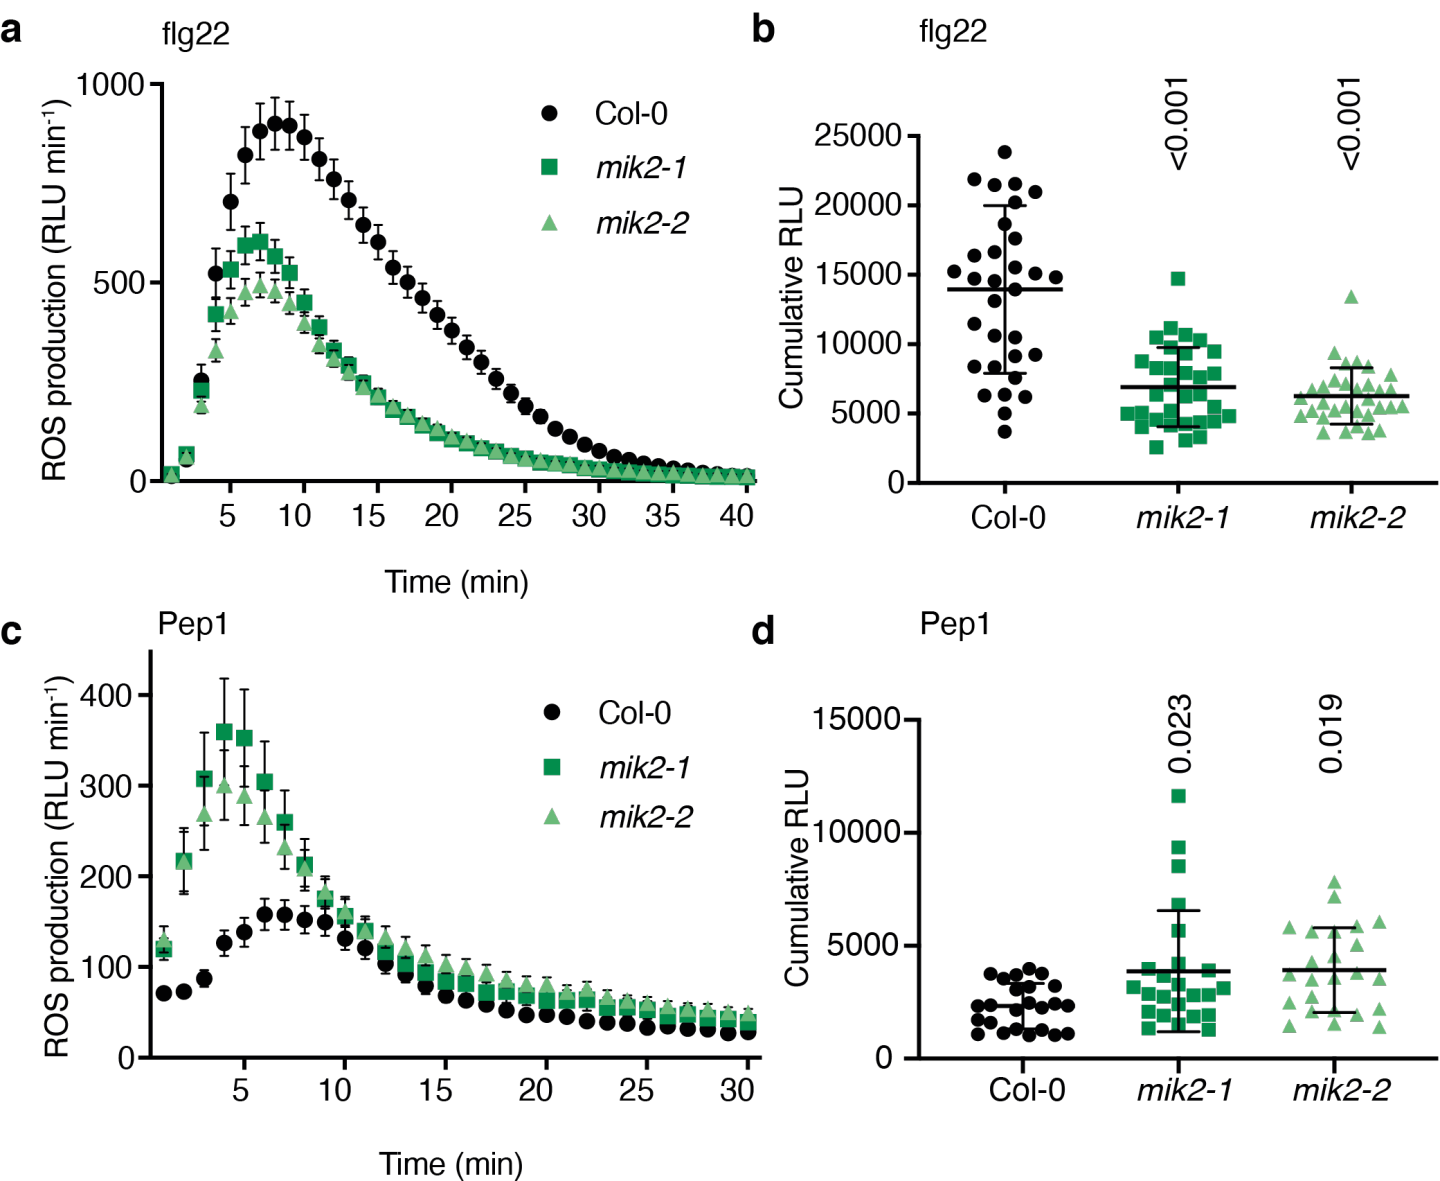

**Supplementary Figure 1. Differential regulation of ROS production in response to flg22 and Pep1 in *mik2* plants.**

(a to d) ROS production in leaf discs collected from 4-week-old *A. thaliana* plants induced by 100 nM flg22 (a and b) ( $n=32$  leaf disks) or 1  $\mu$ M Pep1 (c and d) ( $n=24$  leaf disks). (a and c) Points represent mean; error bars represent S.E.M. (b and d) Integrated ROS production over 40 min (b) and 30 min (d) from (a) and (c) respectively. Line represents mean; error bars represent S.D. P-values indicate significance in a Tukey's multiple comparisons test following one-way ANOVA. Experiments have been repeated and analyzed three times with similar results.

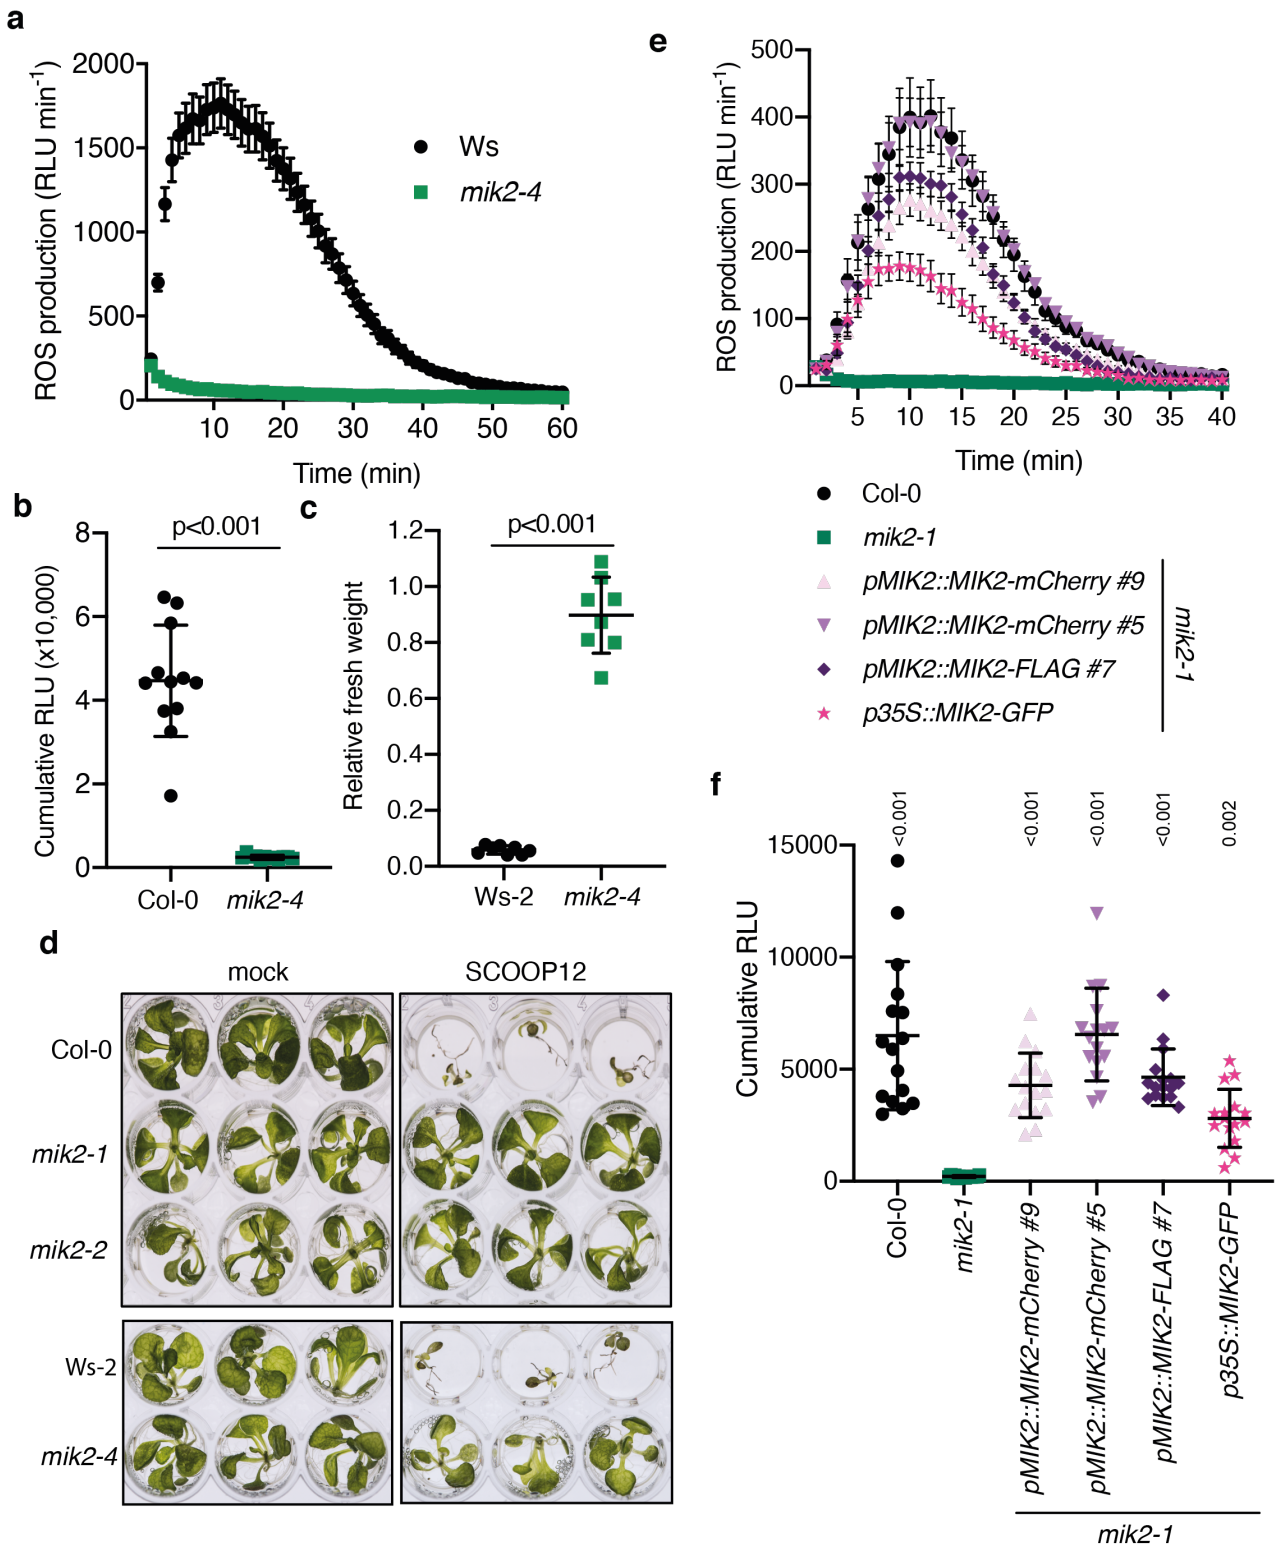

### Supplementary Figure 2. SCOOP12-induced responses are MIK2-dependent.

(a and b) ROS production in leaf discs collected from 4-week-old *A. thaliana* plants induced by 1  $\mu$ M SCOOP12 ( $n=12$  leaf disks). (c) Fresh weight and (d) Images of 14-day-old seedlings grown in the presence of 1  $\mu$ M SCOOP12 for 10 days relative to mock ( $n=8$  seedlings). Line represents mean; error bars represent S.D. P-values indicate the results of two-tailed T-tests. Experiments were repeated and analyzed twice (Ws ecotype) or three times (Col-0 ecotype) with similar results. (e to f) ROS production in leaf discs collected from 4-week-old *A. thaliana* plants induced by 100 nM SCOOP12 ( $n=16$  leaf disks). (a and e) Points represent mean; error bars represent S.E.M. (b and f) Integrated ROS production over 40 min from (a and e). Line represents mean; error bars represent S.D. P-values indicate significance relative to *mik2-1* in a Tukey's multiple comparisons test following one-way ANOVA.

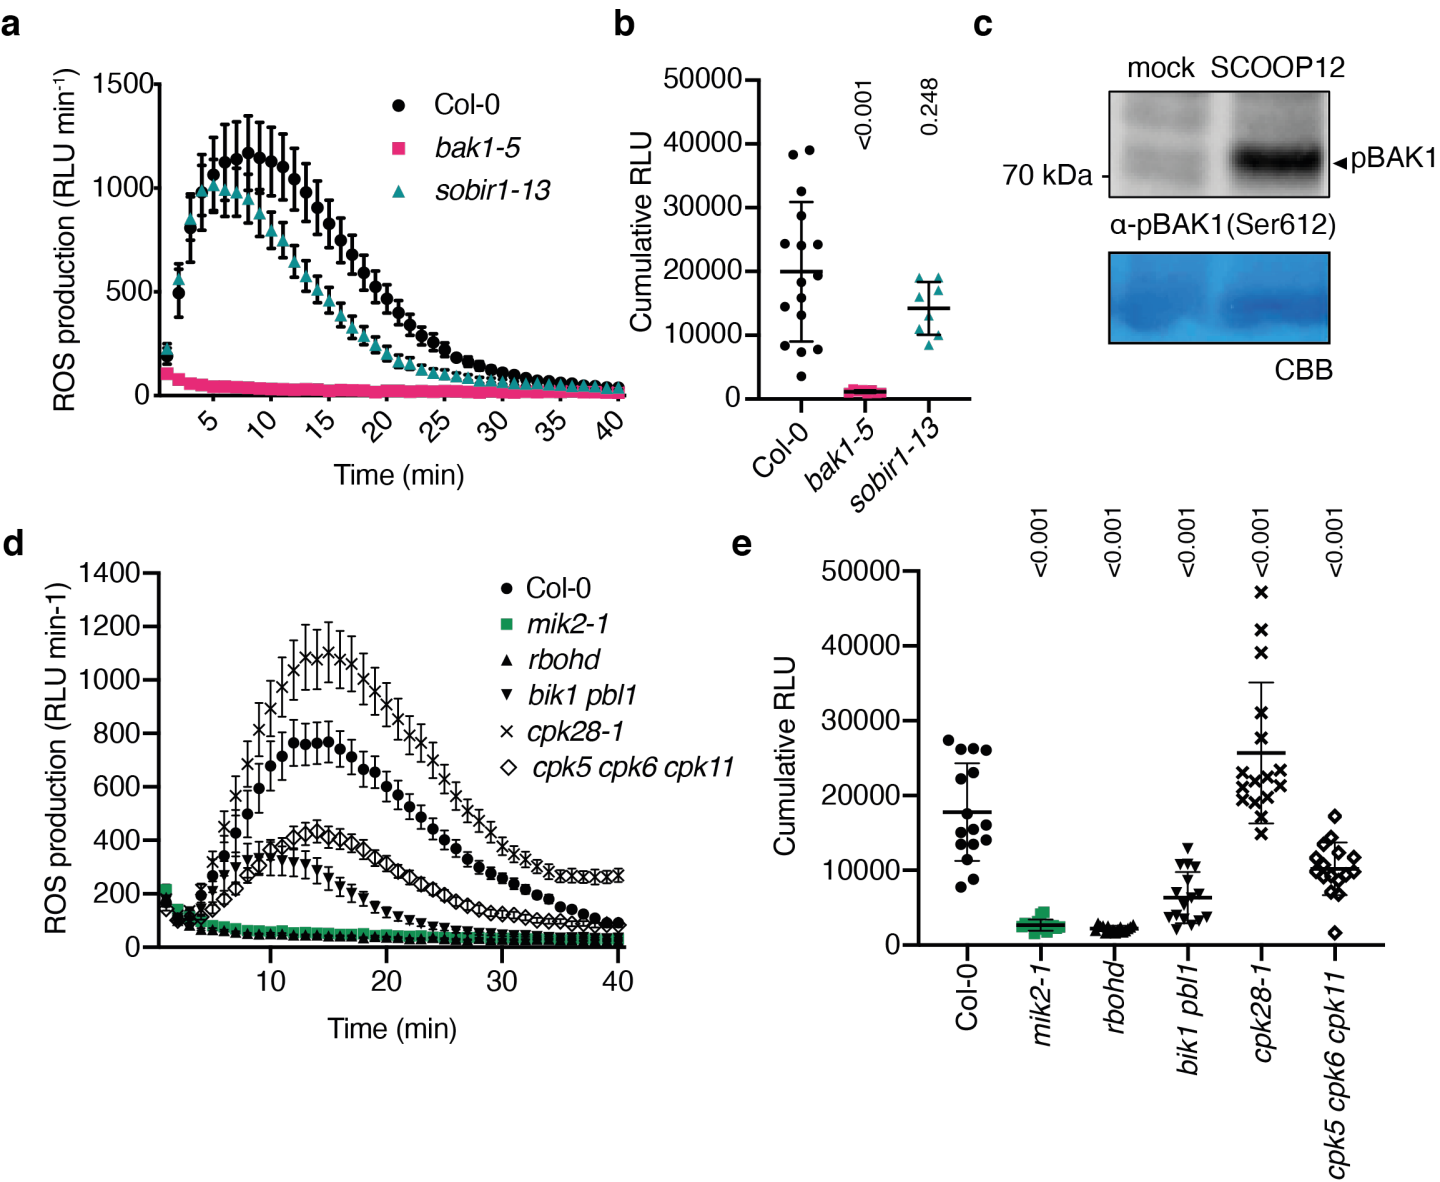

**Supplementary Figure 3. SCOOP12-induced responses are SERK-dependent and SOBIR1-independent. SCOOP12 induces ROS production through a pathway conserved with other LRR-RK pattern-recognition receptors.**

(a and b) ROS production in leaf discs collected from 4-week-old *A. thaliana* plants induced by 1  $\mu$ M SCOOP12 ( $n=16$  leaf disks). (c) Western blot using  $\alpha$ -pBAK1(Ser612) of seedlings after 15 min treatment with 100 nM SCOOP. (d and e) ROS production in leaf discs collected from 4-week-old *A. thaliana* plants induced by 1  $\mu$ M SCOOP12 ( $n=16$  leaf disks). (a and d) Points represent mean; error bars represent S.E.M. (b and e) Integrated ROS production over 40 min from (a and d). Line represents mean; error bars represent S.D. P-values indicate significance relative to Col-0 in a Tukey's multiple comparisons test following one-way ANOVA. Experiments were repeated and analyzed three times with similar results. See Material and Methods for genotype references.

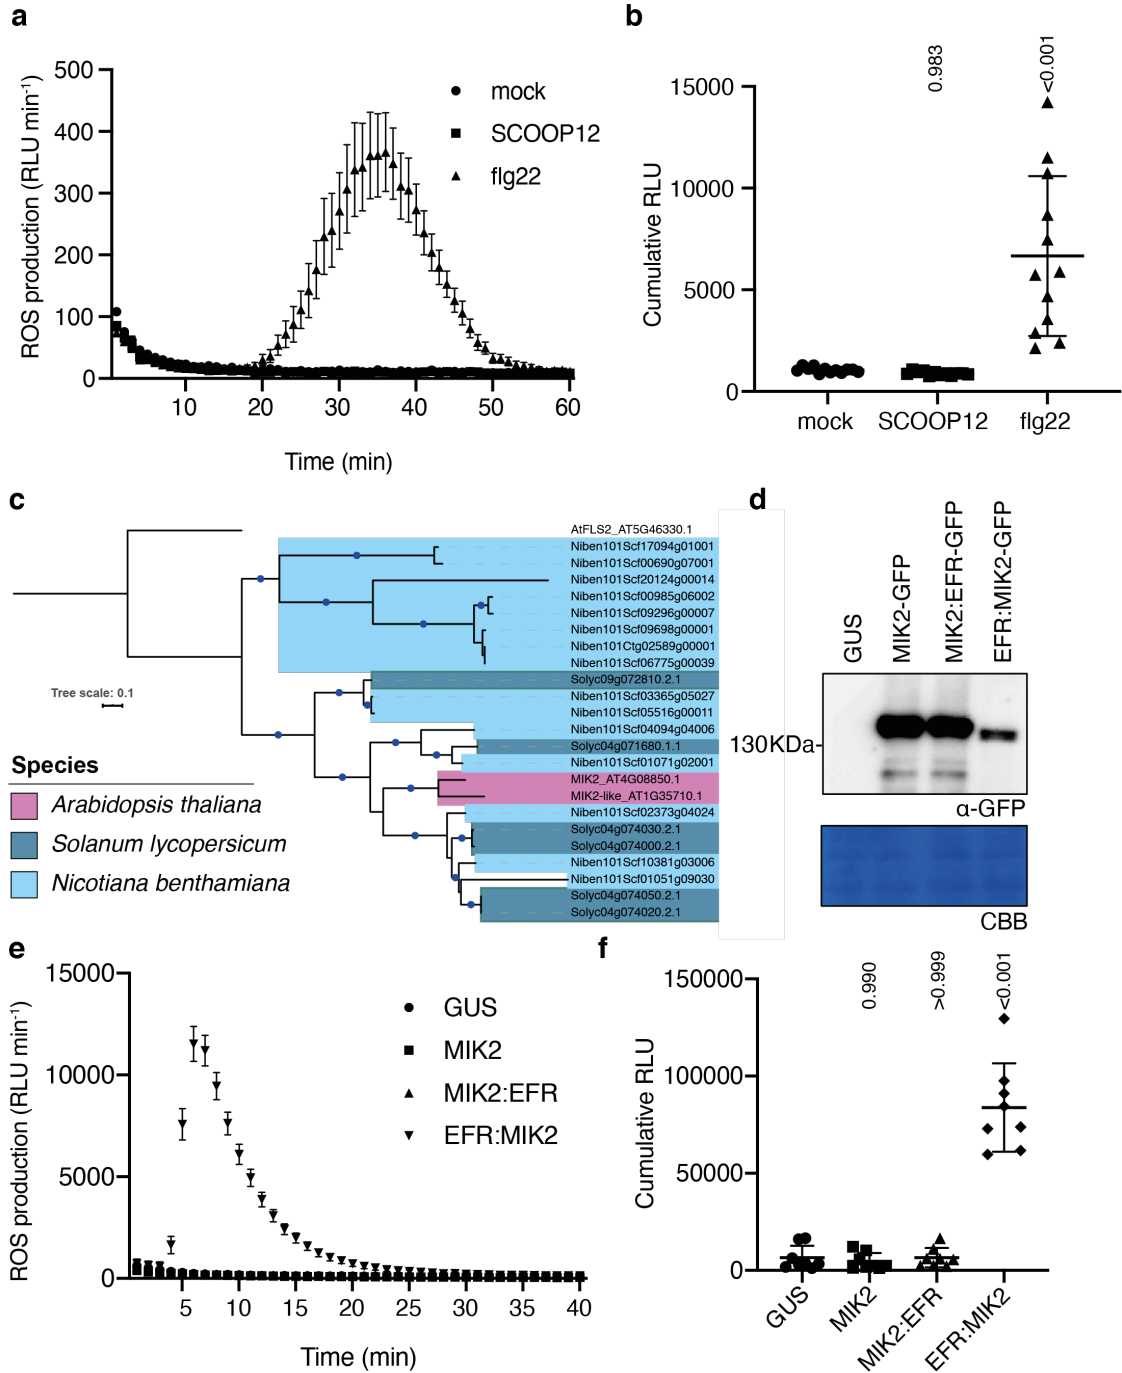

**Supplementary Figure 4. SCOOP12 is unable to induce ROS production in *N. benthamiana*, which lacks a *MIK2* ortholog.**

(a and b) ROS production in leaf discs collected from 3-week-old *N. benthamiana* plants induced by 1  $\mu$ M SCOOP12, 1  $\mu$ M flg22 or mock ( $n=12$  leaf disks). (a) Points represent mean; error bars represent S.E.M. (b) Integrated ROS production over 40 min from (a). Line represents mean; error bars represent S.D. (c) Phylogenetic tree based on LRR-RK subfamily XIIb proteins (as defined in refs. 41 and 42). Amino acid sequences of the kinase domains were aligned using MUSCLE and a tree was generated using PhyML maximum likelihood with LG matrix. The tree was visualized using iTOL. Blue dots indicate nodes with >80% bootstrapping support (100 iterations performed). (d) Western blot using  $\alpha$ -GFP to confirm the accumulation of the respective proteins. CBB is shown as a loading control. (e and f) ROS production induced by 100 nM elf18 in *N. benthamiana* leaf discs transiently expressing the defined constructs ( $n=8$  leaf disks). (e) Points represent mean; error bars represent S.E.M. (f) Integrated ROS production over 40 min from (e). Line represents mean; error bars represent S.D. P-values indicate significance relative to mock or GUS in a Tukey's multiple comparisons test following one-way ANOVA. Experiments were repeated and analyzed three times with similar results.

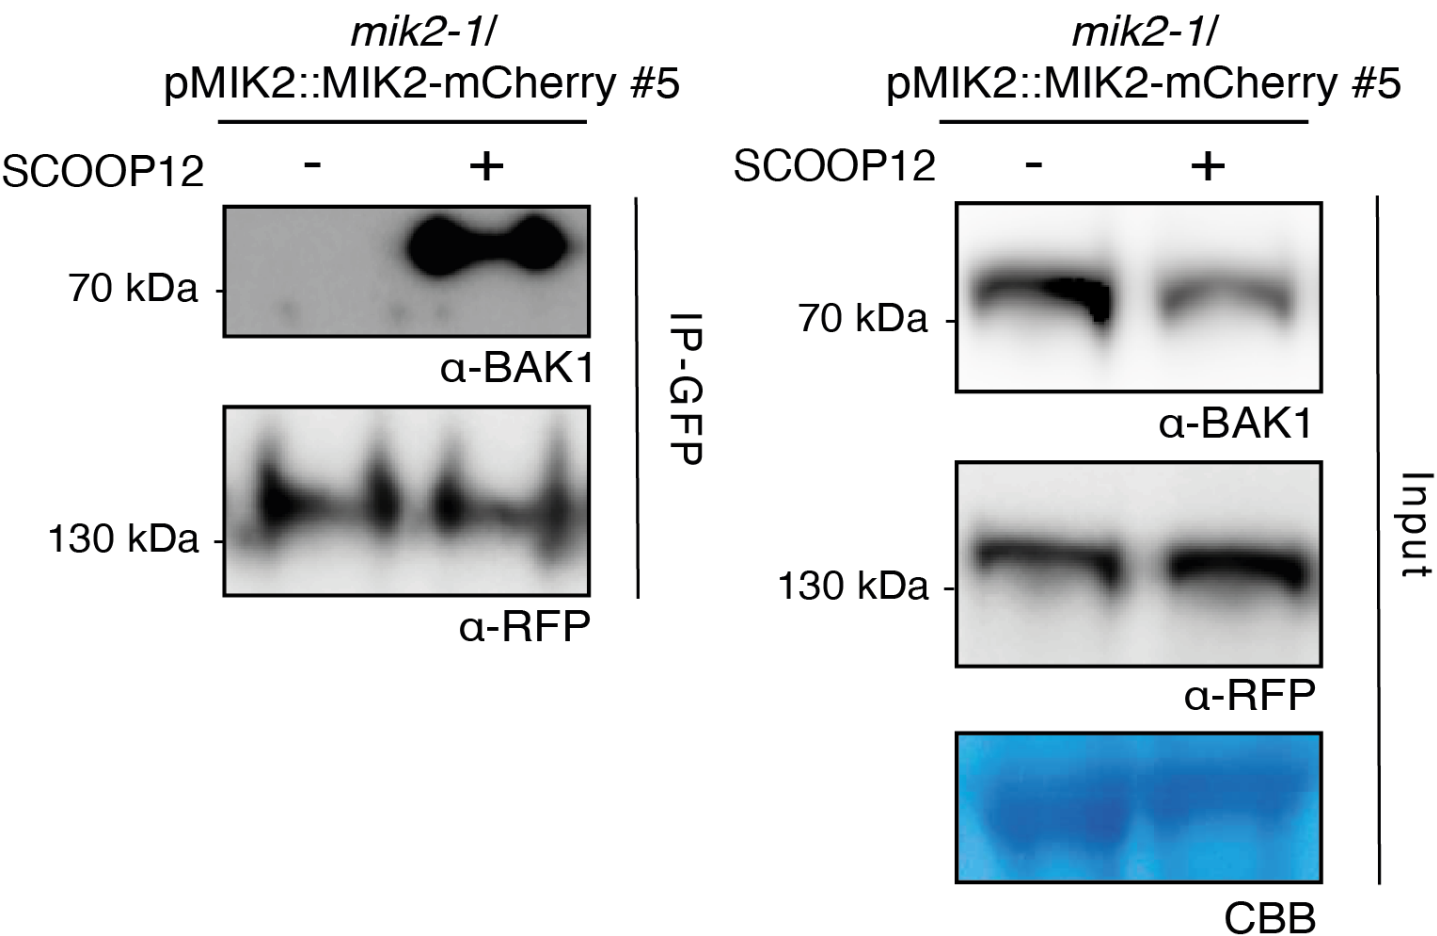

**Supplementary Figure 5. SCOOP12-induced MIK2-BAK1 complex formation is observable when MIK2 is expressed under its native promoter**

(a) Co-immunoprecipitation of BAK1 with MIK2-mCherry from *mik2-1/pMIK2::MIK2-mCherry* seedlings treated with 1  $\mu$ M SCOOP12, or water for 10 min. Western blots were probed with antibodies  $\alpha$ -RFP and  $\alpha$ -BAK1. Experiments were repeated three times with similar results.

**a**

MIK2 vs SCOOP12

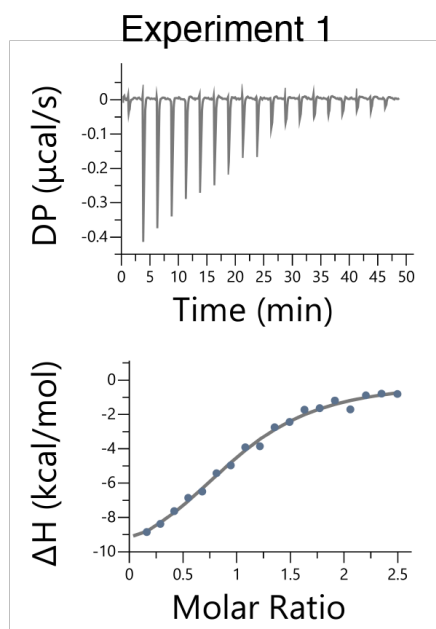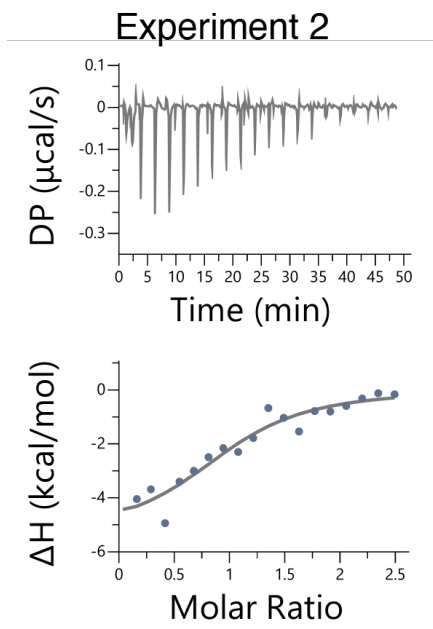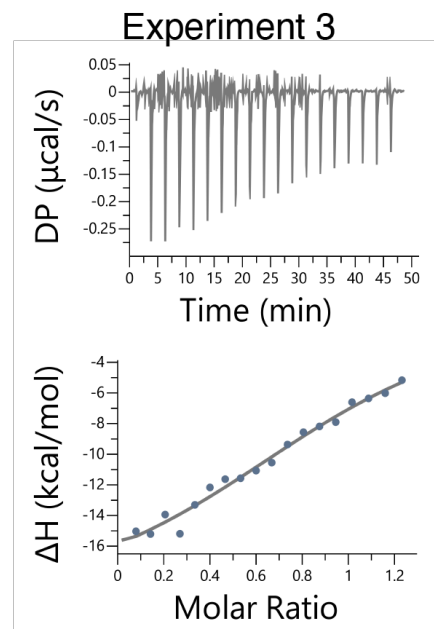

MIK2-SCOOP12 vs BAK1

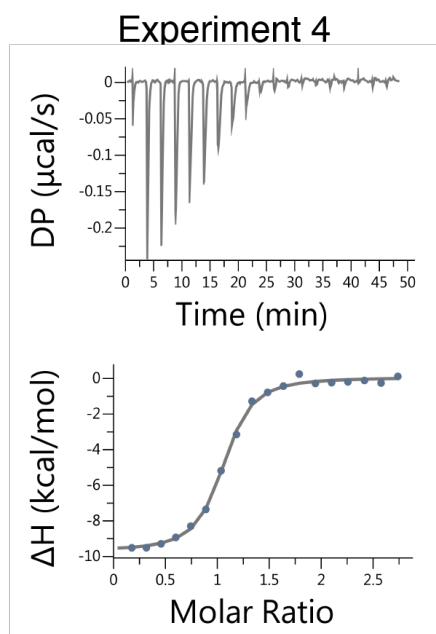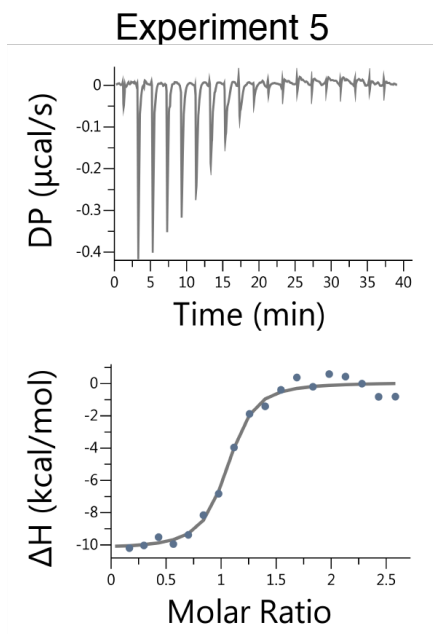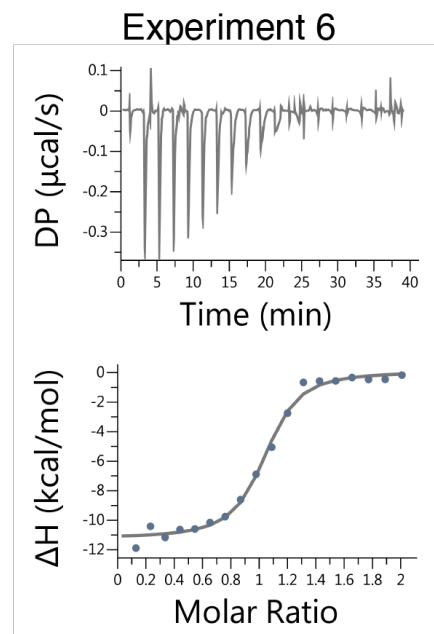**b**

| Experiment | Ligand (Syringe) | Protein (Cell) | pH | K <sub>d</sub> (nM) | ΔH (kcal/mol) | N |
|------------|------------------|----------------|----|---------------------|---------------|---|
| 1          | SCOOP12          | MIK2           | 5  | 5110 ± 1410         | -11.5 ± 1.4   | 1 |
| 2          | SCOOP12          | MIK2           | 5  | 4080 ± 3920         | -5.40 ± 2.2   | 1 |
| 3          | SCOOP12          | MIK2           | 5  | 4490 ± 3970         | -20.2 ± 9.1   | 1 |
| 4          | BAK1             | MIK2-SCOOP12   | 5  | 267 ± 37            | -9.8 ± 0.2    | 1 |
| 5          | BAK1             | MIK2-SCOOP12   | 5  | 273 ± 66            | -11.3 ± 0.4   | 1 |
| 6          | BAK1             | MIK2-SCOOP12   | 5  | 286 ± 92            | -10.3 ± 0.4   | 1 |

**Supplementary Figure 6. Independent ITC experiments of MIK2 vs SCOOP12, and MIK2-SCOOP12 vs BAK1.**

(a) ITC raw thermograms. Experiments 1, 2 and 3 are ITC runs of MIK2 vs SCOOP12. Experiments 4, 5 and 6 are ITC runs of MIK2-SCOOP12 vs BAK1. (b) Table summaries reporting the values measured in each independent experiment. K<sub>d</sub> indicates the binding affinity in nanomolar, ΔH is the enthalpy and N indicates the number of sites (N = 1 for a 1:1 interaction).

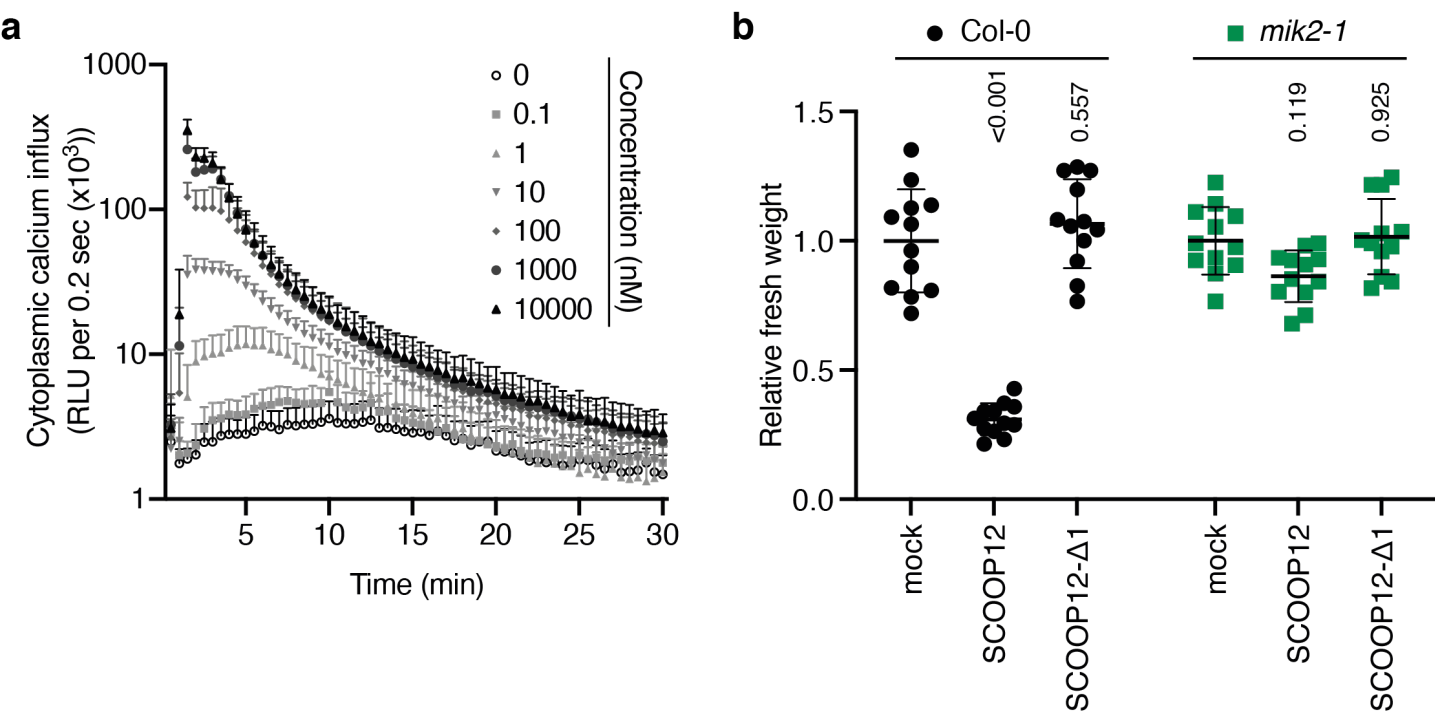

**Supplementary Figure 7. SCOOP12 has discernable activity in the nanomolar range. The C-terminal residue of SCOOP12 is essential for activity.**

(a) SCOOP12-induced cytoplasmic calcium influx measured as RLU in Col-0<sup>35S::AEQ</sup> seedlings (n=12 seedlings). Points represent mean; error bars represent S.E.M. (b) Fresh weight of 14-day-old seedlings grown in the presence of 1  $\mu$ M SCOOP12 or SCOOP12  $\Delta$ 1 for 10 days relative to mock. Line represents mean; error bars represent S.D. P-values indicate significance relative to mock in a Tukey's multiple comparisons test following one-way ANOVA. Experiments were repeated and analyzed three times with similar results.



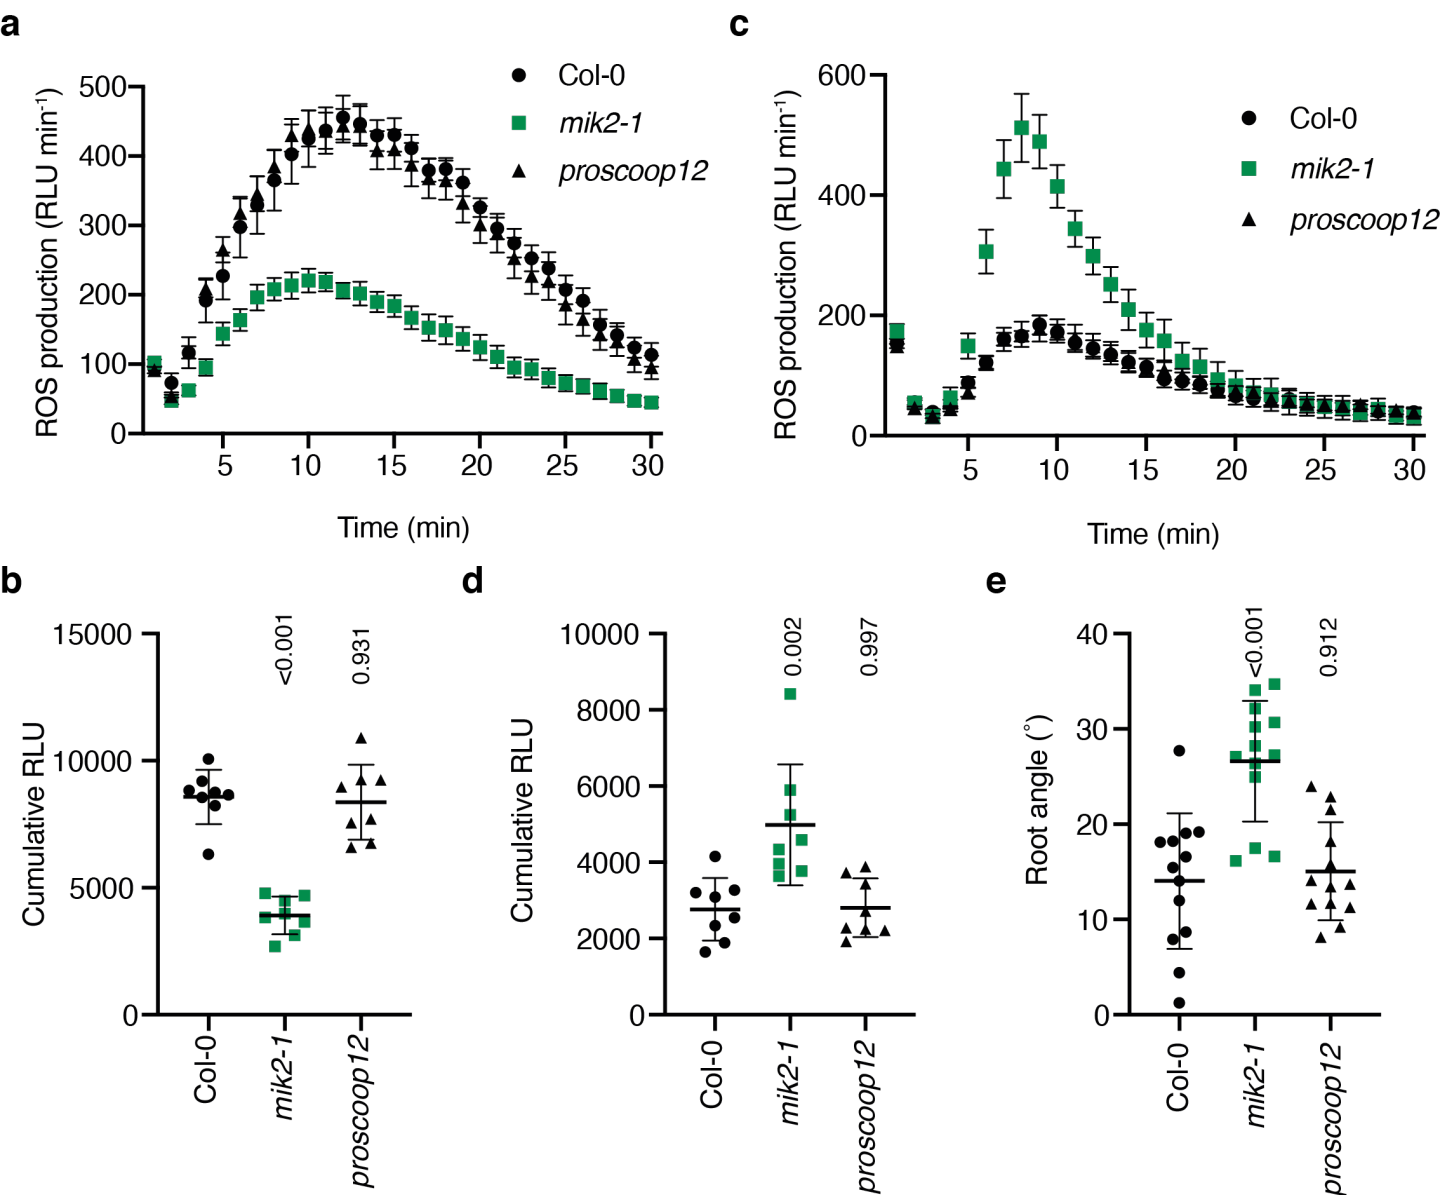

**Supplementary Figure 8. The *proscop12* mutant does not phenocopy *mik2*.**

(a to d) ROS production in leaf discs collected from 4-week-old *A. thaliana* plants induced by 100 nM flg22 (a and b) and 1  $\mu$ M Pep1 (c and d) ( $n=8$  leaf disks). (a and c) Points represent mean; error bars represent S.E.M. (b and d) Integrated ROS production over 30 min. Line represents mean; error bars represent S.D. (e) Quantification of the root angle of 9-day-old seedlings grown in an upright position on MS agar medium ( $n=13$  seedlings). Lines represents mean; error bars represent S.D. P-values indicate significance relative to Col-0 in a Tukey's multiple comparisons test following one-way ANOVA. Experiments were repeated and analyzed three times with similar results.

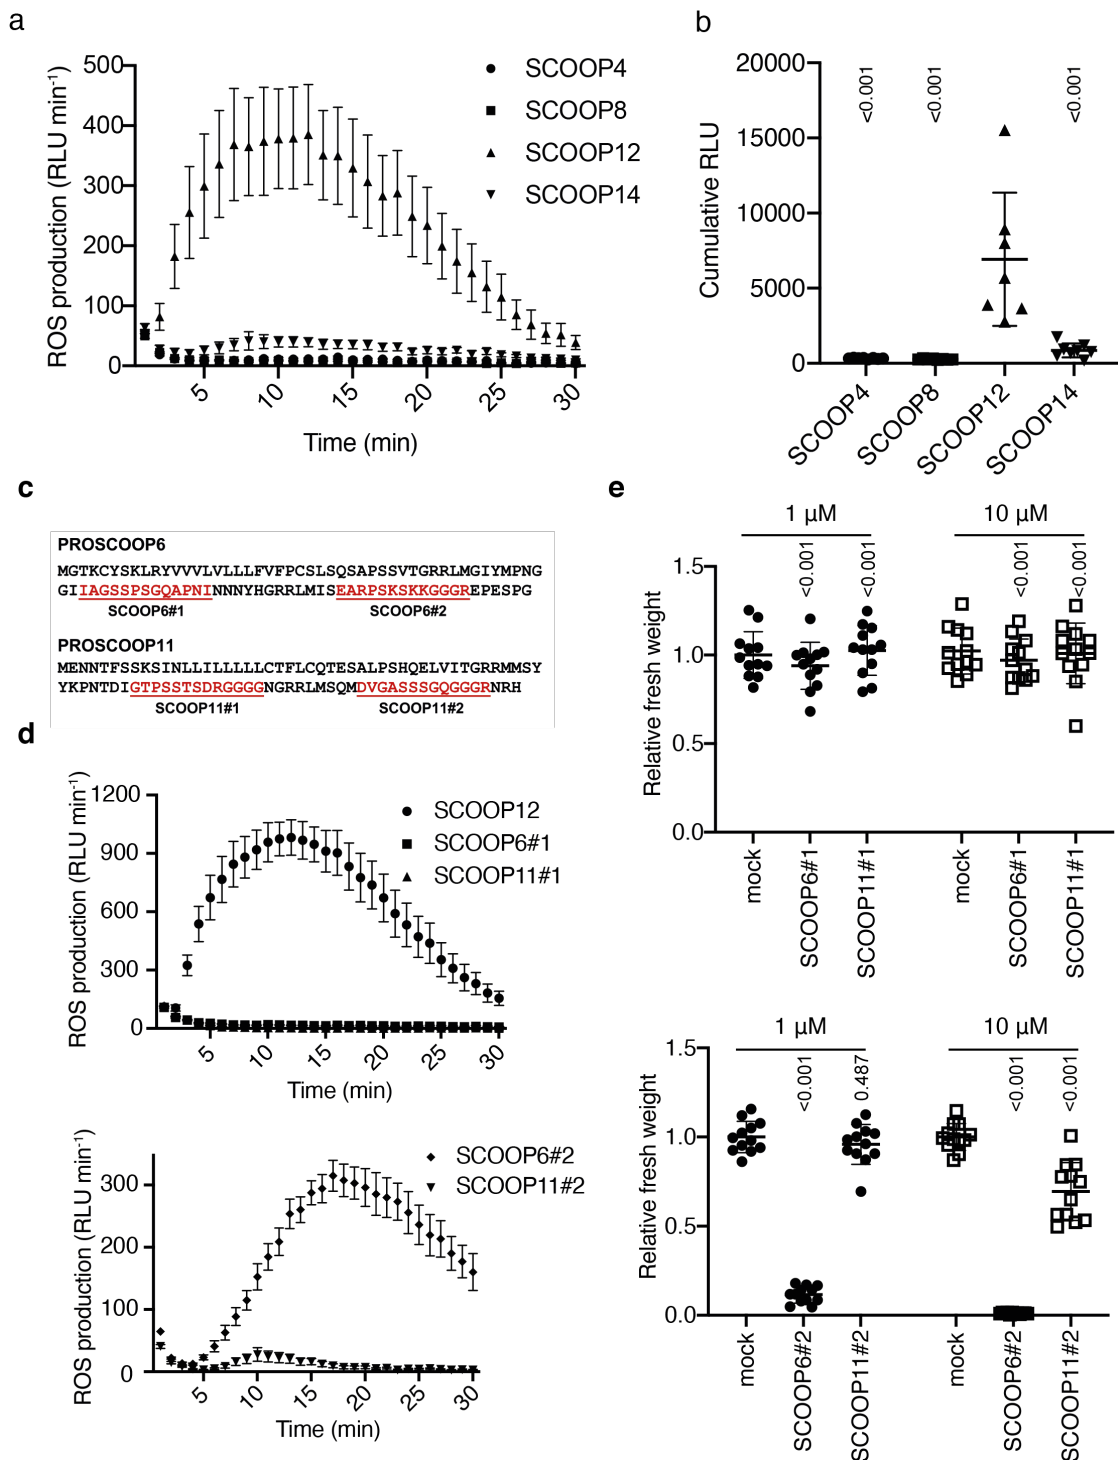

**Supplementary Figure 9. SCOOP4, SCOOP8 and SCOOP14 do not elicit detectable ROS production in Col-0. PROSCOOP6 and PROSCOOP11 contain two SCOOP motifs with only one being active.**

ROS production in leaf discs collected from 4-week-old *A. thaliana* plants induced by 1  $\mu$ M SCOOP4, SCOOP8, SCOOP12 and SCOOP14 ( $n=8$  leaf discs). (b) Integrated ROS production over 40 min. Lines represents mean; error bars represent S.D. Experiments were repeated and analyzed three times with similar results. (c) Amino acid sequence of PROSCOOP6 and PROSCOOP11 with two SCOOP motifs. (d) ROS production induced by 1  $\mu$ M SCOOP in leaf discs from 4-week-old plants ( $n=8$  leaf discs). (a and d) Points represent mean; error bars represent S.E.M. (e) Fresh weight of 14-day-old seedlings grown in the presence of 1  $\mu$ M or 10  $\mu$ M SCOOP for 10 days relative to mock ( $n=12$  seedlings). Lines represent mean; error bars represent S.D. P-values indicate significance relative to SCOOP12 or mock treatment in a Tukey's multiple comparisons test following one-way ANOVA,  $p<0.01$ . Experiments were repeated and analyzed three times with similar results.

**a**

|            |        |        |        |        |          |        |        |        |         |           |         |         |         |
|------------|--------|--------|--------|--------|----------|--------|--------|--------|---------|-----------|---------|---------|---------|
| SCOOP1     | 100.0% |        |        |        |          |        |        |        |         |           |         |         |         |
| SCOOP2     | 30.8%  | 100.0% |        |        |          |        |        |        |         |           |         |         |         |
| SCOOP4     | 23.1%  | 23.1%  | 100.0% |        |          |        |        |        |         |           |         |         |         |
| SCOOP5     | 38.5%  | 46.2%  | 15.4%  | 100.0% |          |        |        |        |         |           |         |         |         |
| SCOOP6#2   | 53.8%  | 23.1%  | 30.8%  | 30.8%  | 100.0%   |        |        |        |         |           |         |         |         |
| SCOOP7     | 46.2%  | 15.4%  | 23.1%  | 23.1%  | 69.2%    | 100.0% |        |        |         |           |         |         |         |
| SCOOP8     | 38.5%  | 15.4%  | 23.1%  | 15.4%  | 30.8%    | 46.2%  | 100.0% |        |         |           |         |         |         |
| SCOOP9     | 46.2%  | 23.1%  | 15.4%  | 23.1%  | 38.5%    | 53.8%  | 30.8%  | 100.0% |         |           |         |         |         |
| SCOOP10    | 53.8%  | 15.4%  | 23.1%  | 30.8%  | 53.8%    | 69.2%  | 38.5%  | 69.2%  | 100.0%  |           |         |         |         |
| SCOOP11#2  | 38.5%  | 23.1%  | 23.1%  | 30.8%  | 46.2%    | 69.2%  | 53.8%  | 46.2%  | 61.5%   | 100.0%    |         |         |         |
| SCOOP12    | 30.8%  | 46.2%  | 23.1%  | 30.8%  | 46.2%    | 46.2%  | 46.2%  | 23.1%  | 38.5%   | 53.8%     | 100.0%  |         |         |
| SCOOP13    | 53.8%  | 15.4%  | 46.2%  | 23.1%  | 53.8%    | 46.2%  | 23.1%  | 30.8%  | 38.5%   | 30.8%     | 23.1%   | 100.0%  |         |
| SCOOP14    | 46.2%  | 23.1%  | 38.5%  | 30.8%  | 46.2%    | 38.5%  | 23.1%  | 30.8%  | 46.2%   | 38.5%     | 30.8%   | 61.5%   | 100.0%  |
| RKL12880.1 | 23.1%  | 46.2%  | 15.4%  | 23.1%  | 23.1%    | 30.8%  | 23.1%  | 15.4%  | 23.1%   | 38.5%     | 69.2%   | 23.1%   | 30.8%   |
| RKK91479.1 | 23.1%  | 46.2%  | 15.4%  | 23.1%  | 23.1%    | 30.8%  | 23.1%  | 23.1%  | 23.1%   | 23.1%     | 61.5%   | 15.4%   | 15.4%   |
| KIL85672.1 | 23.1%  | 23.1%  | 23.1%  | 15.4%  | 23.1%    | 38.5%  | 38.5%  | 23.1%  | 23.1%   | 30.8%     | 61.5%   | 23.1%   | 23.1%   |
| A0A0D2XZ19 | 30.8%  | 23.1%  | 23.1%  | 23.1%  | 38.5%    | 38.5%  | 38.5%  | 38.5%  | 46.2%   | 46.2%     | 53.8%   | 30.8%   | 30.8%   |
| I1RWN2     | 53.8%  | 46.2%  | 23.1%  | 38.5%  | 30.8%    | 38.5%  | 30.8%  | 30.8%  | 38.5%   | 38.5%     | 30.8%   | 46.2%   | 38.5%   |
| X0K0D8     | 53.8%  | 30.8%  | 23.1%  | 38.5%  | 38.5%    | 38.5%  | 30.8%  | 30.8%  | 38.5%   | 38.5%     | 30.8%   | 30.8%   | 30.8%   |
| A0A0D2XQW0 | 46.2%  | 38.5%  | 23.1%  | 23.1%  | 38.5%    | 38.5%  | 30.8%  | 53.8%  | 46.2%   | 38.5%     | 38.5%   | 38.5%   | 46.2%   |
| A0A0D2XVW5 | 46.2%  | 23.1%  | 15.4%  | 30.8%  | 38.5%    | 46.2%  | 30.8%  | 46.2%  | 46.2%   | 38.5%     | 23.1%   | 30.8%   | 30.8%   |
| A0A098DTX8 | 38.5%  | 15.4%  | 15.4%  | 23.1%  | 30.8%    | 30.8%  | 38.5%  | 53.8%  | 53.8%   | 38.5%     | 30.8%   | 23.1%   | 23.1%   |
| A0A0M9EVJ7 | 53.8%  | 23.1%  | 23.1%  | 38.5%  | 46.2%    | 61.5%  | 38.5%  | 53.8%  | 69.2%   | 61.5%     | 30.8%   | 38.5%   | 46.2%   |
| RKK80373.1 | 46.2%  | 23.1%  | 30.8%  | 23.1%  | 46.2%    | 61.5%  | 38.5%  | 46.2%  | 53.8%   | 46.2%     | 30.8%   | 38.5%   | 38.5%   |
| F9FC73     | 46.2%  | 38.5%  | 23.1%  | 38.5%  | 46.2%    | 30.8%  | 30.8%  | 23.1%  | 30.8%   | 30.8%     | 46.2%   | 30.8%   | 30.8%   |
| F9G0P6     | 46.2%  | 38.5%  | 23.1%  | 23.1%  | 30.8%    | 38.5%  | 30.8%  | 38.5%  | 38.5%   | 30.8%     | 30.8%   | 38.5%   | 30.8%   |
|            | SCOOP1 | SCOOP2 | SCOOP4 | SCOOP5 | SCOOP6#2 | SCOOP7 | SCOOP8 | SCOOP9 | SCOOP10 | SCOOP11#2 | SCOOP12 | SCOOP13 | SCOOP14 |

**b**

|            | SCOOP1 | SCOOP2 | SCOOP4 | SCOOP5 | SCOOP6#2 | SCOOP7 | SCOOP8 | SCOOP9 | SCOOP10 | SCOOP11#2 | SCOOP12 | SCOOP13 | SCOOP14 |
|------------|--------|--------|--------|--------|----------|--------|--------|--------|---------|-----------|---------|---------|---------|
| SCOOP1     | 1      | 0.1    | 0.02   | 0.17   | 0.59     | 0.43   | 0.27   | 0.35   | 0.36    | 0.31      | 0.23    | 0.5     | 0.37    |
| SCOOP2     | 0.09   | 1      | 0.05   | 0.35   | 0.13     | -0.01  | -0.02  | 0.01   | -0.1    | 0.04      | 0.39    | 0       | -0.01   |
| SCOOP4     | 0.02   | 0.06   | 1      | -0.03  | 0.1      | 0.02   | -0.04  | -0.06  | 0       | 0         | 0       | 0.23    | 0.18    |
| SCOOP5     | 0.15   | 0.34   | -0.02  | 1      | 0.19     | 0.02   | -0.13  | 0      | 0       | 0.06      | 0.14    | 0.16    | 0.14    |
| SCOOP6#2   | 0.56   | 0.13   | 0.1    | 0.2    | 1        | 0.63   | 0.17   | 0.24   | 0.37    | 0.43      | 0.47    | 0.41    | 0.28    |
| SCOOP7     | 0.42   | -0.01  | 0.02   | 0.03   | 0.65     | 1      | 0.26   | 0.47   | 0.6     | 0.68      | 0.41    | 0.3     | 0.21    |
| SCOOP8     | 0.26   | -0.03  | -0.04  | -0.14  | 0.17     | 0.26   | 1      | 0.13   | 0.14    | 0.45      | 0.34    | 0       | 0.01    |
| SCOOP9     | 0.36   | 0.01   | -0.07  | 0      | 0.26     | 0.5    | 0.14   | 1      | 0.61    | 0.42      | 0.12    | 0.11    | 0.1     |
| SCOOP10    | 0.38   | -0.12  | 0      | 0      | 0.41     | 0.65   | 0.16   | 0.62   | 1       | 0.59      | 0.25    | 0.25    | 0.29    |
| SCOOP11#2  | 0.29   | 0.04   | 0      | 0.06   | 0.43     | 0.65   | 0.44   | 0.37   | 0.52    | 1         | 0.5     | 0.13    | 0.18    |
| SCOOP12    | 0.21   | 0.37   | 0      | 0.14   | 0.44     | 0.37   | 0.32   | 0.1    | 0.21    | 0.48      | 1       | 0.08    | 0.08    |
| SCOOP13    | 0.5    | 0      | 0.24   | 0.18   | 0.44     | 0.31   | 0      | 0.1    | 0.24    | 0.15      | 0.09    | 1       | 0.67    |
| SCOOP14    | 0.39   | -0.01  | 0.2    | 0.17   | 0.31     | 0.23   | 0.01   | 0.1    | 0.29    | 0.21      | 0.09    | 0.69    | 1       |
| RKL12880.1 | 0.08   | 0.28   | -0.1   | 0.04   | 0.07     | 0.11   | 0      | -0.04  | -0.02   | 0.21      | 0.55    | 0.09    | 0.09    |
| RKK91479.1 | 0.11   | 0.39   | 0      | 0.12   | 0.14     | 0.08   | 0.08   | 0.13   | 0.01    | 0.12      | 0.57    | -0.01   | -0.04   |
| KIL85672.1 | 0.08   | 0.13   | -0.01  | 0.04   | 0.14     | 0.21   | 0.19   | 0.06   | -0.01   | 0.19      | 0.52    | 0.11    | 0.08    |
| A0A0D2XZ19 | 0.14   | 0.07   | -0.05  | 0.03   | 0.26     | 0.23   | 0.27   | 0.27   | 0.37    | 0.31      | 0.49    | 0.13    | 0.1     |
| I1RWN2     | 0.42   | 0.37   | 0.01   | 0.18   | 0.25     | 0.33   | 0.17   | 0.14   | 0.18    | 0.34      | 0.23    | 0.38    | 0.27    |
| X0K0D8     | 0.35   | 0.09   | 0.12   | 0.25   | 0.31     | 0.28   | 0.05   | 0.14   | 0.22    | 0.21      | 0.23    | 0.16    | 0.13    |
| A0A0D2XQW0 | 0.4    | 0.24   | 0.02   | 0.04   | 0.25     | 0.28   | 0.23   | 0.37   | 0.26    | 0.37      | 0.34    | 0.2     | 0.28    |
| A0A0D2XVW5 | 0.28   | 0      | -0.08  | 0.15   | 0.26     | 0.36   | 0.05   | 0.32   | 0.29    | 0.19      | 0.07    | 0.15    | 0.1     |
| A0A098DTX8 | 0.25   | -0.01  | -0.07  | 0.04   | 0.2      | 0.42   | 0.22   | 0.47   | 0.41    | 0.34      | 0.23    | 0.02    | 0       |
| A0A0M9EVJ7 | 0.42   | 0.01   | 0.1    | 0.15   | 0.43     | 0.57   | 0.23   | 0.43   | 0.56    | 0.63      | 0.2     | 0.27    | 0.35    |
| RKK80373.1 | 0.28   | -0.03  | 0.14   | -0.01  | 0.31     | 0.52   | 0.13   | 0.33   | 0.4     | 0.31      | 0.17    | 0.25    | 0.21    |
| F9FC73     | 0.32   | 0.22   | 0.08   | 0.21   | 0.4      | 0.2    | 0.3    | 0.08   | 0.12    | 0.31      | 0.44    | 0.12    | 0.14    |
| F9G0P6     | 0.42   | 0.22   | 0.08   | 0.01   | 0.22     | 0.33   | 0.2    | 0.21   | 0.2     | 0.25      | 0.25    | 0.27    | 0.2     |

**Supplementary Figure 10. Similarity matrices of *Arabidopsis* SCOOP peptides and SCOOP-like peptides from *Fusarium* proteomes**

(a and b) Similarity matrices showing (a) percentage identity and (b) a normalized similarity score generated using the BLOSUM62 matrix. Active *Fusarium* epitopes are outlined.

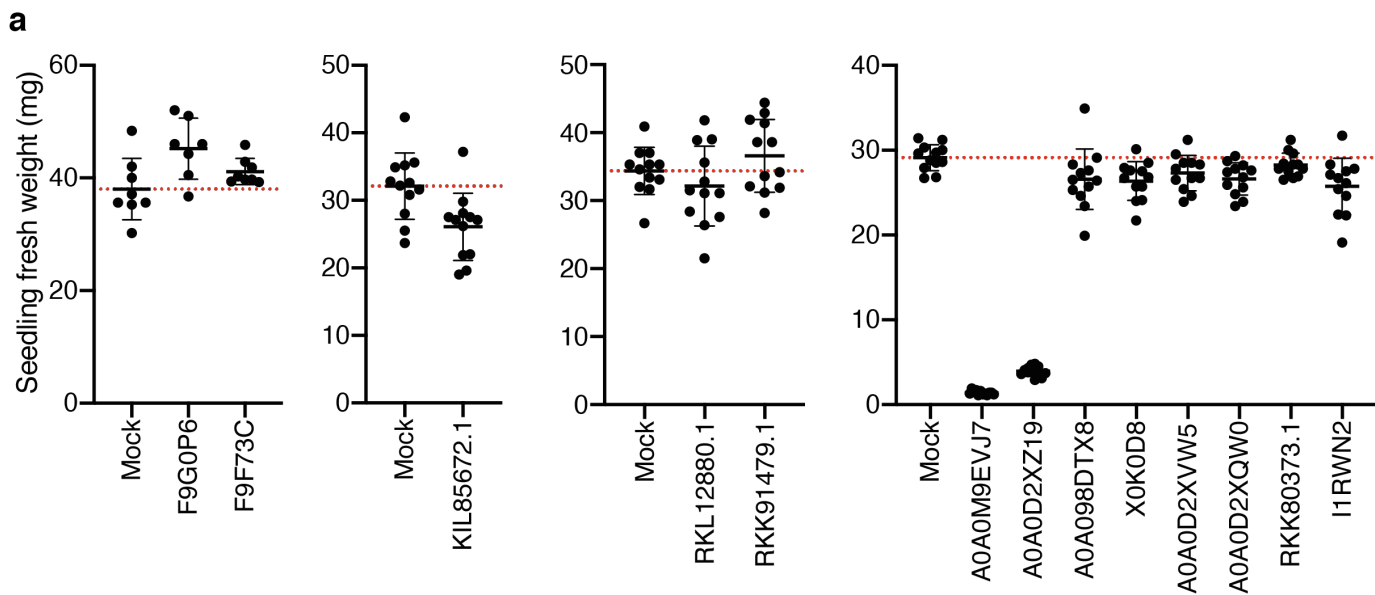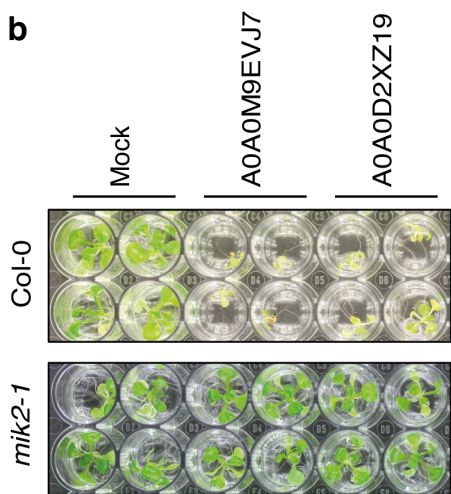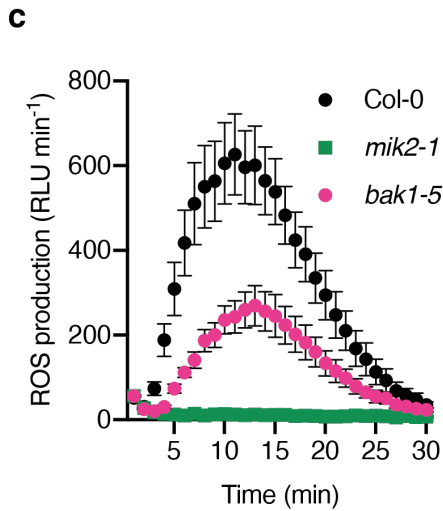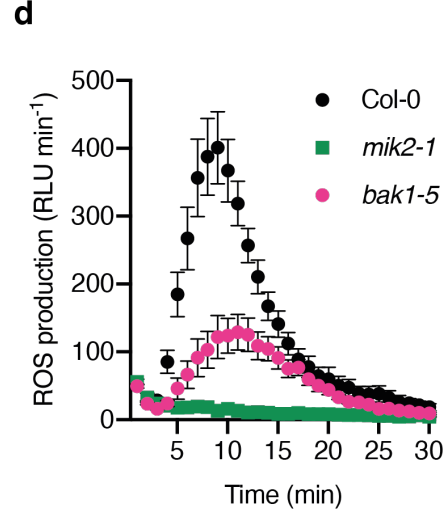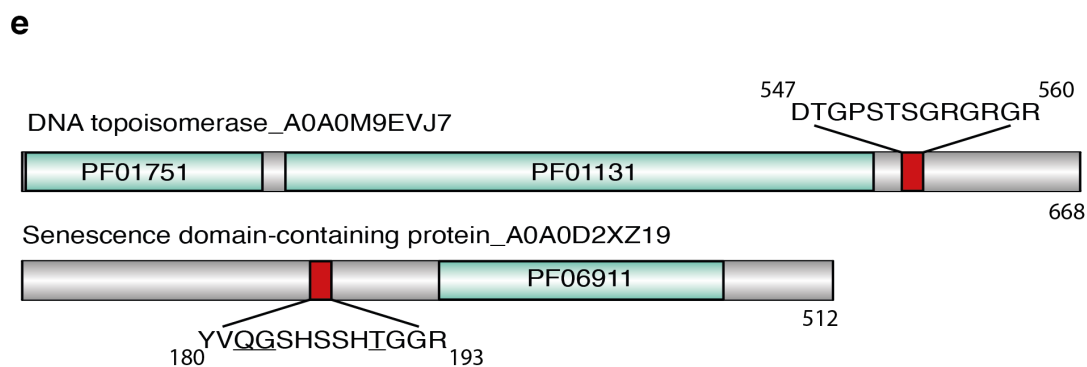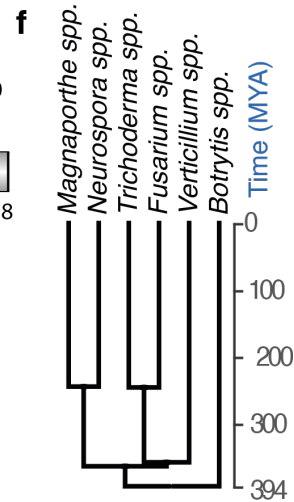

**Supplementary Figure 11. Identification and characterization of active SCOOP-like peptides from *Fusarium* proteomes**

(a) Fresh weight of 14-day-old seedlings grown in the presence of *Fusarium*-derived peptides at 10  $\mu$ M concentration for 10 days. Line represents mean; error bars represent S.D. Dashed red line indicates the mock mean value. (F9G0P6 and F9F73C  $n=8$  seedlings ; all other peptides  $n=12$  seedlings) (b) Images of 14-day-old seedlings grown in the presence of *Fusarium*-derived peptides at 10  $\mu$ M concentration for 10 days. (c and d) ROS production in leaf discs collected from 4-week-old *A. thaliana* plants induced by (c) 1  $\mu$ M A0A0M9EVJ7 or (d) 1  $\mu$ M A0A0D2XZ191 application ( $n=8$  leaf discs). Points represent mean; error bars represent S.E.M. Integrated data shown in Figure 4 (d and e). (e) Schematic representation of the *Fusarium* proteins from which the active peptides were derived. Green areas indicate regions with homology to Pfam domains. Red areas indicate SCOOP-like motifs highlighted. Underlined amino acid positions indicate the amino acid at this position is not shared with any *Arabidopsis* SCOOPs. (f) Tree of predicted lineage divergence generated using TimeTree for the lineages shown in (e and f) with *Botrytis cinerea* included as an outgroup. (a and b) were performed only once as a screen, whilst (c and d) were performed three times with similar results.

| Peptide             | Sequence                  | Reference |
|---------------------|---------------------------|-----------|
| flg22               | QRLSTGSRINSAKDDAAGLQIA    | 51        |
| Pep1                | ATKVKAKQRGKEKVSSGRPGQHN   | 52        |
| elf18               | acetyl-MSKEKFERTKPHVNVGTI | 53        |
| SCOOP1              | ETPPSRSRGGGG              |           |
| SCOOP2              | PVRSSRSPRSPSF             |           |
| SCOOP4              | ASFHSASPKDKGP             |           |
| SCOOP5              | IVRRRSRQRGRQY             |           |
| SCOOP6#1            | IAGSSPSGQAPNI             |           |
| SCOOP6#2            | EARPSKSKKGGGR             |           |
| SCOOP7              | RAGPSKSGQGGGR             |           |
| SCOOP8              | DFEGSISGQAGGG             |           |
| SCOOP9              | GTGPSHSGHGGSS             |           |
| SCOOP10             | FTGPSGSGHGGGR             |           |
| SCOOP11#1           | GTPSSTSDRGGGG             |           |
| SCOOP11#2           | DVGASSSGQGGGR             |           |
| SCOOP12             | PVRSSQSSQAGGR             | 12        |
| SCOOP13             | YLPPSKSRKGKGP             |           |
| SCOOP14             | FVPPSTSHKGQGP             |           |
| SCOOP12- $\Delta$ 1 | PVRSSQSSQAGG              |           |

**Supplementary Table 1. List of synthetic peptides used in this study.**

| Gene identifier | Peptide sequence | Proteome    | Species                                                         |
|-----------------|------------------|-------------|-----------------------------------------------------------------|
| RKL12880.1      | PVPSSQSSQSLPR    | UP000286305 | <i>Fusarium oxysporum</i>                                       |
| RKK91479.1      | PTRSSQSSQSNTA    | UP000285237 | <i>Fusarium oxysporum</i>                                       |
| KIL85672.1      | RIKSSQSSQAGIP    | PRJNA253730 | <i>Fusarium avenaceum</i>                                       |
| A0A0D2XZ19      | YVQGSHTSHTGGR    | UP000009097 | <i>Fusarium oxysporum</i> f. sp. <i>lycopersici</i>             |
| I1RWN2          | QLPSSRSGRGPGM    | UP000070720 | <i>Fusarium graminearum</i>                                     |
| X0K0D8          | LELQSRARGGGT     | UP000030685 | <i>Fusarium oxysporum</i> f. sp. <i>cubense tropical race 4</i> |
| A0A0D2XQW0      | PTPSSTSGKGGSA    | UP000009097 | <i>Fusarium oxysporum</i> f. sp. <i>lycopersici</i>             |
| A0A0D2XVW5      | VQTPSRSGDGGDV    | UP000009097 | <i>Fusarium oxysporum</i> f. sp. <i>lycopersici</i>             |
| A0A098DTX8      | RTAGSQSGHGGDE    | UP000070720 | <i>Fusarium graminearum</i>                                     |
| A0A0M9EVJ7      | DTGPSTSGRGRGR    | UP000037904 | <i>Fusarium langsethiae</i>                                     |
| RKK80373.1      | VAGPSRSGGQGGP    | UP000285237 | <i>Fusarium oxysporum</i> f. sp. <i>radicis-cucumerinum</i>     |
| F9FC73          | ELRRSTSSRSGGA    | UP000002489 | <i>Fusarium oxysporum</i> (strain <i>Fo5176</i> )               |
| F9G0P6          | KTPSSKSGRSDGS    | UP000002489 | <i>Fusarium oxysporum</i> (strain <i>Fo5176</i> )               |

**Supplementary Table 2. SCOOP-like peptide sequences from *Fusarium* proteomes identified through BLAST and MAST analysis.**

| Use        | Genotype/construct  | Sequence                                          |
|------------|---------------------|---------------------------------------------------|
| Genotyping | <i>mik2-1</i>       | ttagactttgtcccagttgg                              |
| Genotyping |                     | atgaaccgtttctctggaacc                             |
| Genotyping | <i>mik2-2</i>       | caaaggggaatagtttctccgg                            |
| Genotyping |                     | ttagtagactttgccgtgtcc                             |
| Genotyping | <i>mik2-4</i>       | cttgggtcaatccaaacacaagcagc                        |
| Genotyping |                     | gctggttgattcatcctctcaaac                          |
| Genotyping | <i>sobir1-13</i>    | tagggcatacaatgctgaagc                             |
| Genotyping |                     | tcaagaactaatgtggccagc                             |
| Genotyping | SALK left border    | atattgccgatttcggaac                               |
| Genotyping | FLAG left border    | cgtgtgccaggtgccacggaatagt                         |
| Cloning    | <i>MIK2:EFR</i>     | cacaaggatcgaaacctagtgtcagtggtattgtataggtatagc     |
| Cloning    |                     | ccaactgacaactaggttcgatcctgtgtgatttcttgagg         |
| Cloning    | <i>EFR:MIK2</i>     | gcctctgtcagttagaaagaaaatcatctacatactagtccgatcatcg |
| Cloning    |                     | cgatgatcggaactagtagtagatgatttcttctaaactgacagagggc |
| Cloning    | <i>MIK2.1 cDNA</i>  | caccatgaacaaaacaaaccag                            |
| Cloning    |                     | agaaaaggcagtgagatagagagc                          |
| Cloning    | pMIK2::MIK2<br>gDNA | gtagagggtctccggaggcagttgtatgattggtgcaa            |
| Cloning    |                     | aatggcggctctcccgaagaaaaggcagtgagatagagagc         |
| Cloning    | M13                 | tgtaaaacgacggccagt                                |
| Cloning    |                     | caggaaacagctatgaccatg                             |

**Supplementary Table 3. Primers used in this study.**



| Name    | Gene model  |
|---------|-------------|
| SCOOP1  | AT5G44565.1 |
| SCOOP2  | AT5G44567.1 |
| SCOOP4  | AT5G44568.1 |
| SCOOP5  | AT5G44570.3 |
| SCOOP6  | AT5G44572.1 |
| SCOOP7  | AT5G44574.1 |
| SCOOP8  | AT5G44575.1 |
| SCOOP9  | AT5G44578.1 |
| SCOOP10 | AT5G44580.1 |
| SCOOP11 | AT5G44582.1 |
| SCOOP12 | AT5G44585.1 |
| SCOOP13 | AT1G22885.1 |
| SCOOP14 | AT1G22890.1 |

**Supplementary Table 4. Gene models corresponding to SCOOP peptides studied.**
